# Supplementary material for: Impact of metabolic risk factors on hepatic and cardiac outcomes in patients with alcohol- and non-alcohol-related fatty liver disease
Source: PubMed Central journal article supplement — JHEP Rep. 2023 Mar 5;5(6):100721. doi: 10.1016/j.jhepr.2023.100721 (PMC10149369; doi:10.1016/j.jhepr.2023.100721), 2023-03-05
Supplement: mmc1.pdf [file mmc1.pdf]

**Journal of Hepatology, Volume ■**

**Supplemental information**

**Impact of metabolic risk factors on hepatic and cardiac outcomes in patients with alcohol- and non-alcohol-related fatty liver disease**

**Jihye Lim, Hyunji Sang, and Ha Il Kim**

# Impact of metabolic risk factors on hepatic and cardiac outcomes in patients with alcohol- and non-alcohol-related fatty liver disease

Jihye Lim, Hyunji Sang, Ha Il Kim

## Table of Contents

|          |    |
|----------|----|
| Fig. S1  | 2  |
| Fig. S2  | 3  |
| Fig. S3  | 4  |
| Fig. S4  | 5  |
| Fig. S5  | 6  |
| Fig. S6  | 7  |
| Table S1 | 8  |
| Table S2 | 11 |
| Table S3 | 13 |
| Table S4 | 17 |
| Table S5 | 18 |
| Table S6 | 21 |
| Table S7 | 22 |

**Fig. S1.** Flow chart of study population

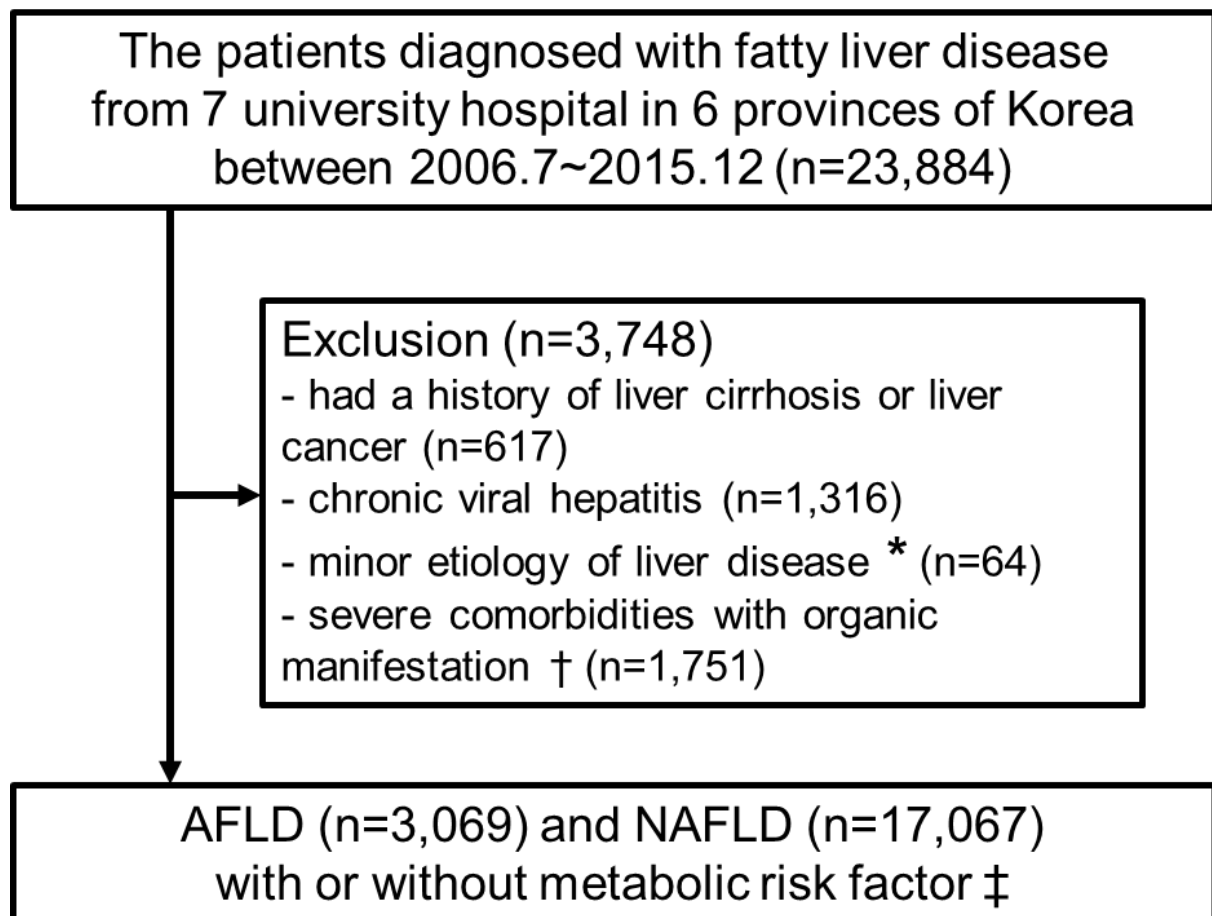

\* Including primary biliary cholangitis, primary sclerosing cholangitis, Wilson's disease, hemochromatosis, and autoimmune hepatitis.

† Heart failure, ischemic heart disease, atrial fibrillation, chronic obstructive lung disease, cerebral infarction, and chronic kidney disease.

‡ Diabetes mellitus, hypertension, dyslipidemia, and obesity

**Fig. S2.** The trend of incidence of cirrhosis, liver cancer, heart disease, and death between the patients without MetR and newly developed MetR within 5 years compared (A) in AFLD group and (B) in NAFLD group

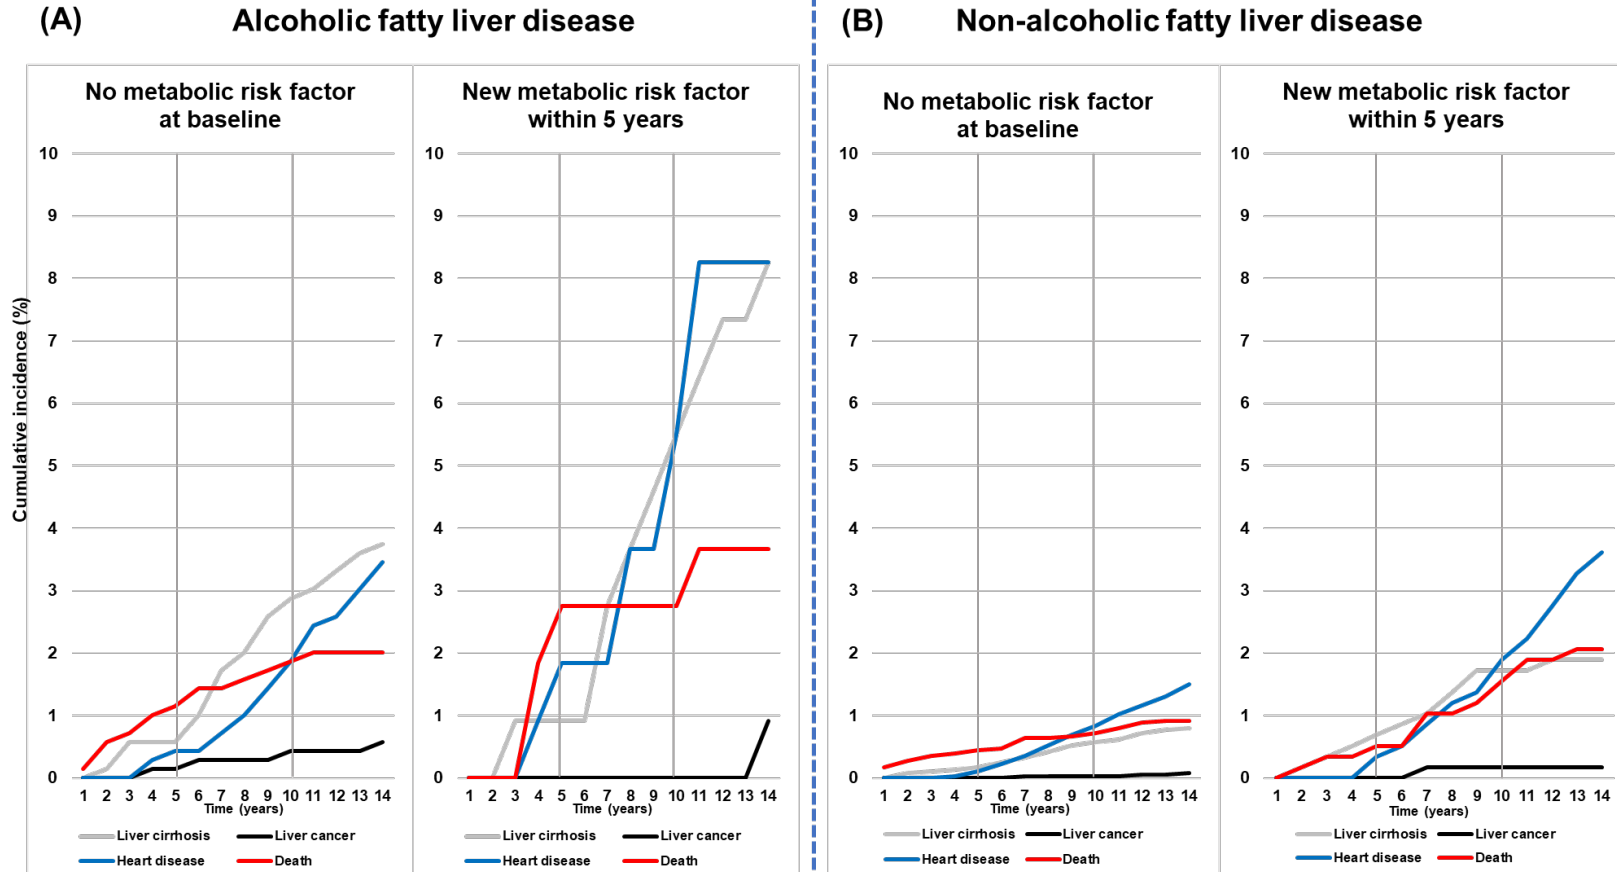

AFLD, alcoholic fatty liver disease; NAFLD, non-alcoholic fatty liver disease; MetR, metabolic risk factor

**Fig. S3.** Cumulative incidence patterns of heart disease and stroke in patients with alcoholic fatty liver disease and non-alcoholic fatty liver disease.

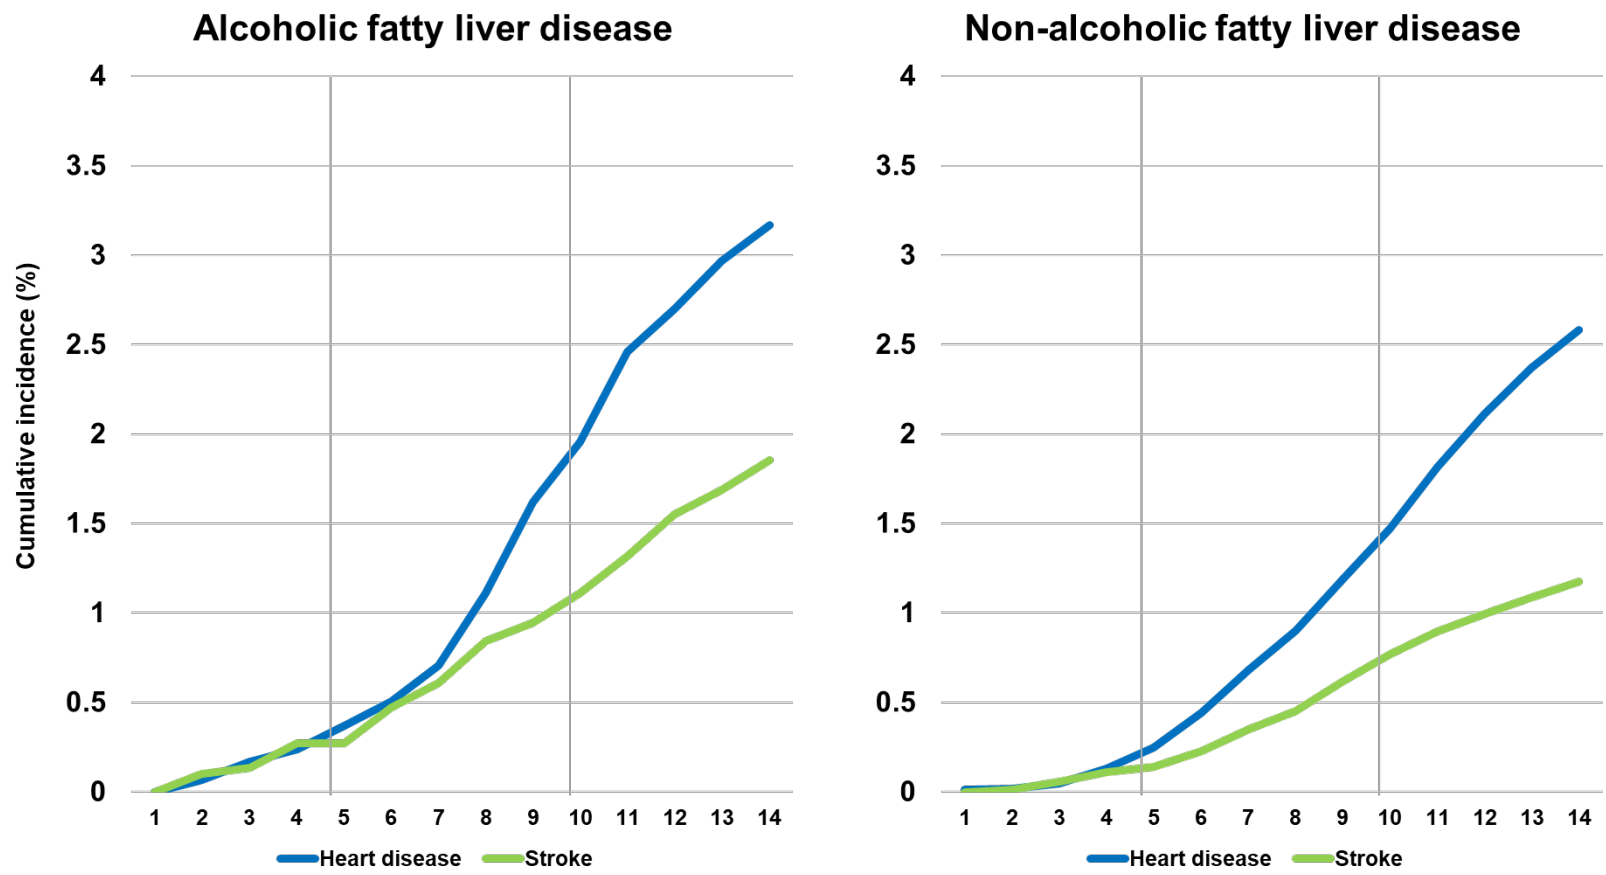

**Fig. S4.** Cumulative incidence patterns of heart disease and stroke in patients without metabolic risk factors, risk factor  $\geq 1$ , and risk factor  $\geq 2$ : (A) alcoholic fatty liver disease, (B) non-alcoholic fatty liver disease

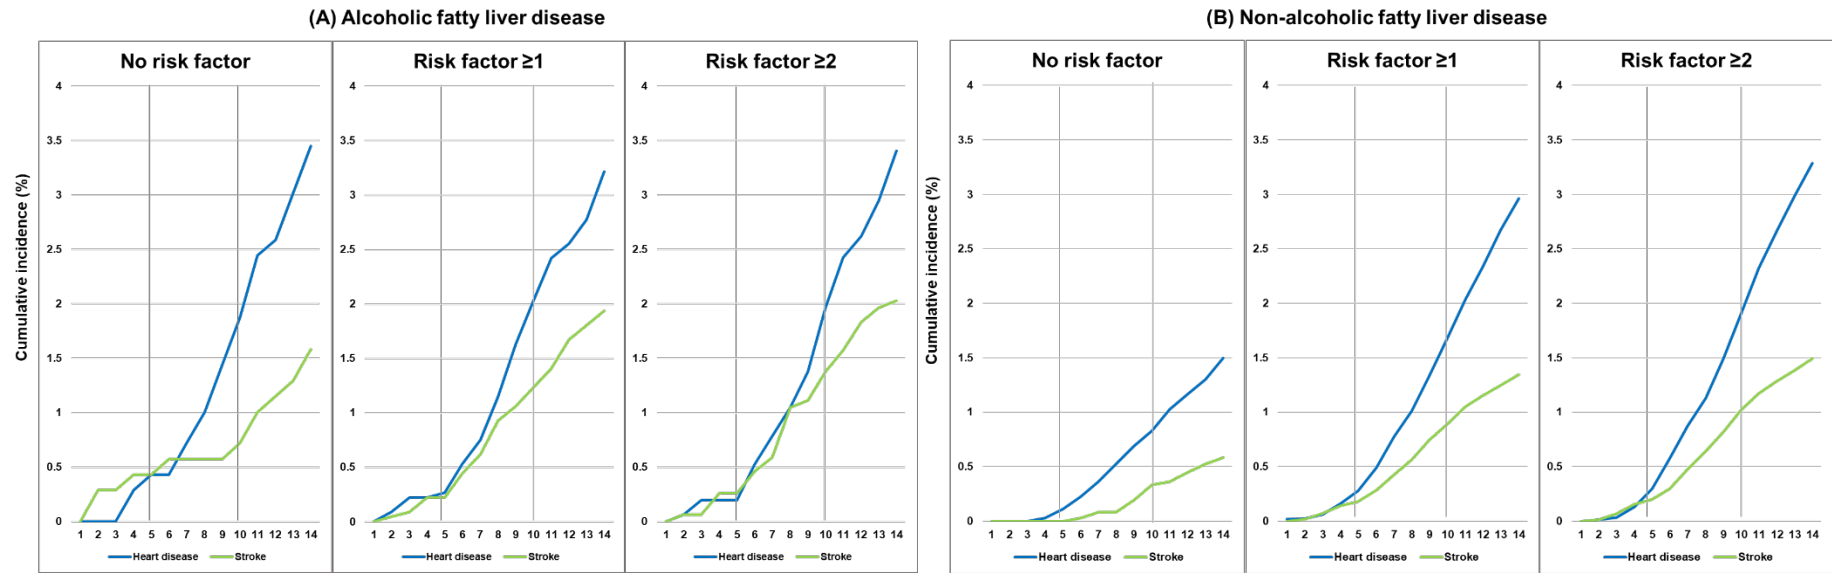

**Fig. S5.** Intergroup comparison of cumulative incidence of stroke in (A) patients without metabolic risk factors, (B) risk factor  $\geq 1$ , and (C) risk factor  $\geq 2$ .

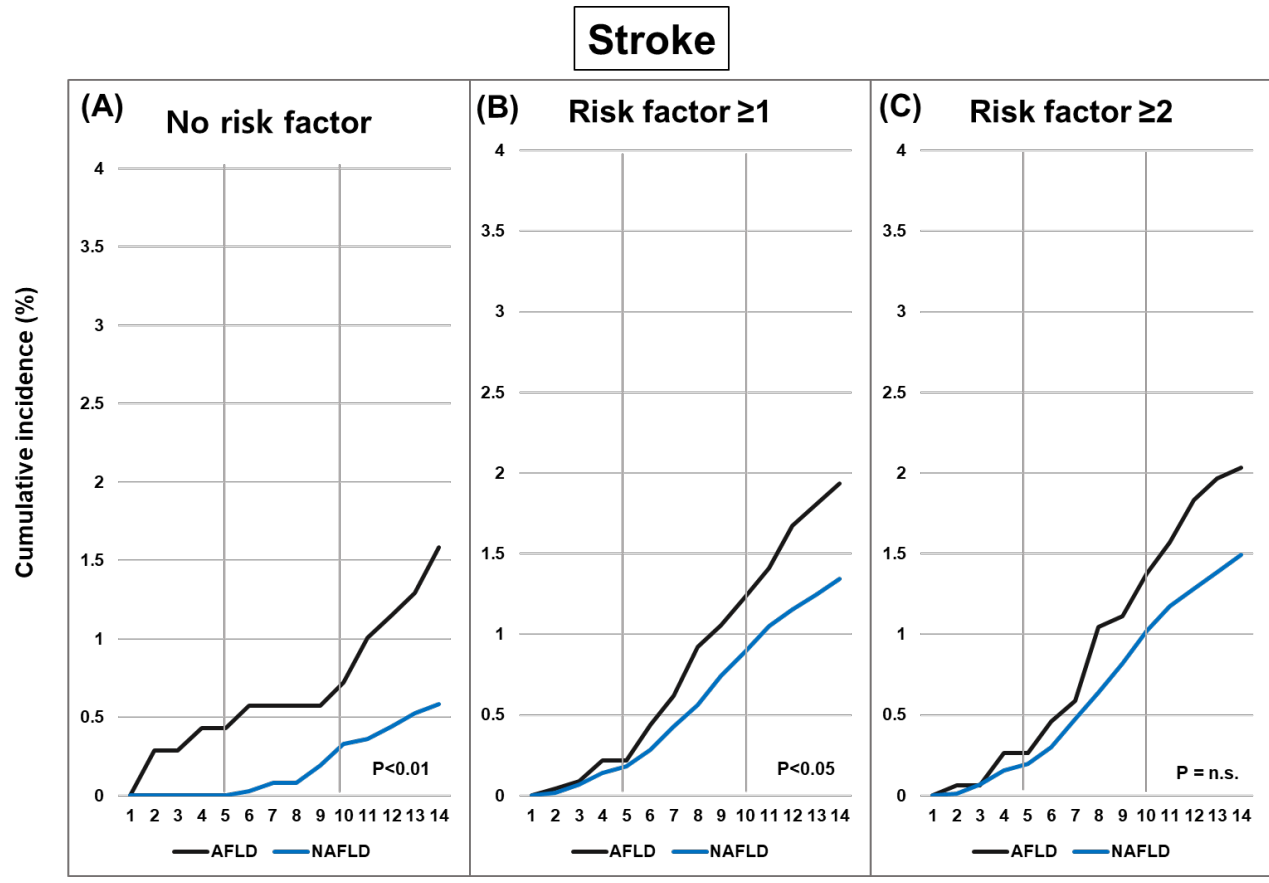

AFLD, alcoholic fatty liver disease; NAFLD, non-alcoholic fatty liver disease

Log-rank tests used to examine the differences in cumulative risks, level of significance,  $p < 0.05$

**Fig. S6.** Intergroup comparison of cumulative incidence of stroke in (A) patients without metabolic risk factors, (B) risk factor  $\geq 1$ , and (C) risk factor  $\geq 2$ .

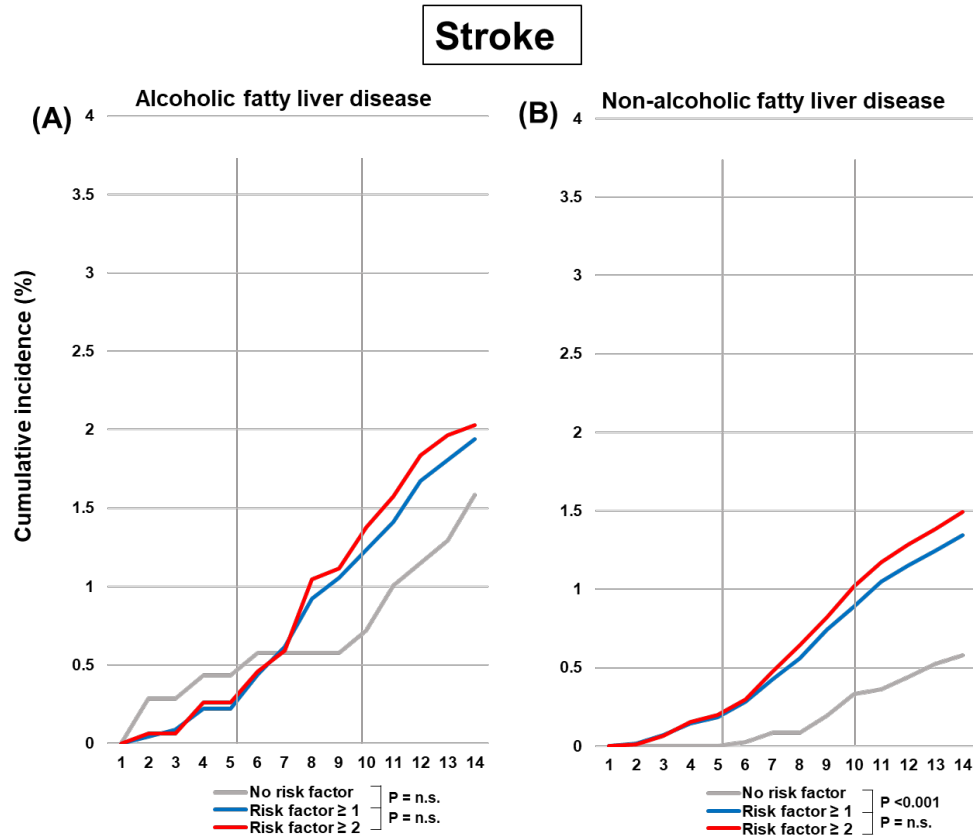

Log-rank tests used to examine the differences in cumulative risks, level of significance,  $p < 0.05$



**Table S1.** Concept identification and concept codes for concept sets

| Concept sets                               | Concept identification                               | Concept code                                         | Name                                                                                                                                                                                       |                                                                                                                                                       |
|--------------------------------------------|------------------------------------------------------|------------------------------------------------------|--------------------------------------------------------------------------------------------------------------------------------------------------------------------------------------------|-------------------------------------------------------------------------------------------------------------------------------------------------------|
| Fatty liver disease                        | Alcoholic fatty liver disease                        | 193256                                               | 50325005                                                                                                                                                                                   | Alcoholic fatty liver                                                                                                                                 |
|                                            | Non-alcoholic fatty liver disease                    | 4059290                                              | 197321007                                                                                                                                                                                  | Steatosis of liver                                                                                                                                    |
| Drinking pattern                           | Current drinker at baseline                          | 4074035, 4038558, 4336673                            | 219006, 228279004, 86933000                                                                                                                                                                | Current drinker, Very heavy drinker, Heavy drinker                                                                                                    |
|                                            | Non-drinker at baseline                              | 4022664                                              | 105542008                                                                                                                                                                                  | Non-drinker                                                                                                                                           |
| Liver cirrhosis                            | Definition of pre-existing liver cirrhosis           | 4064161, 194643, 192675, 4046123, 4340394, 4340385   | 19943007, 420054005, 1761006, 12368000, 235899008, 23588004                                                                                                                                | Cirrhosis of liver, Alcoholic cirrhosis, Biliary cirrhosis, Secondary biliary cirrhosis, Hepatic sclerosis, Alcoholic fibrosis and sclerosis of liver |
|                                            | Definition of newly diagnosed <b>Liver cirrhosis</b> | 4064161, 194643                                      | 19943007, 420054005                                                                                                                                                                        | Cirrhosis of liver, Alcoholic cirrhosis                                                                                                               |
| Liver cancer                               | Definition of pre-existing primary liver cancer      | 4001171, 201519                                      | 109841003, 95214007                                                                                                                                                                        | Hepatocellular carcinoma, Primary malignant neoplasm of liver                                                                                         |
|                                            | Definition of newly diagnosed <b>Liver cancer</b>    | 4001171                                              | 109841003                                                                                                                                                                                  | Hepatocellular carcinoma                                                                                                                              |
| Chronic viral hepatitis                    | 439674, 192240, 197493, 198964, 4012113              | 186639003, 235869004, 235865005, 128302006, 10295004 | Chronic viral hepatitis B without delta-agent, Hepatitis D superinfection of hepatitis B carrier, Chronic viral hepatitis B with hepatitis D, Chronic hepatitis C, Chronic viral hepatitis |                                                                                                                                                       |
| Minor etiologies for chronic liver disease | 4135822, 40577758,                                   | 31712002, 4032000,                                   | Primary biliary cholangitis, Primary sclerosing                                                                                                                                            |                                                                                                                                                       |

|                       |                   |                                                                    |                                                                    |                                                                                                                                                                                                                                                                                                                              |
|-----------------------|-------------------|--------------------------------------------------------------------|--------------------------------------------------------------------|------------------------------------------------------------------------------------------------------------------------------------------------------------------------------------------------------------------------------------------------------------------------------------------------------------------------------|
|                       |                   | 4229262, 4163735,200762                                            | 88518009, 399187006,<br>408335007                                  | cholangitis, Wilson's disease,<br>Hemochromatosis, Autoimmune hepatitis                                                                                                                                                                                                                                                      |
| Metabolic risk factor | Diabetes mellitus | 4193704, 201826, 3004410,<br>3037110                               | 313436004, 44054006,<br>4548-4, 1558-6                             | Type 2 diabetes mellitus without<br>complication, Type 2 diabetes mellitus,<br>Hemoglobin A1c/Hemoglobin.total in Blood,<br>Fasting glucose [Mass/volume] in Serum of<br>Plasma                                                                                                                                              |
|                       | Hypertension      | 316866, 320128, 3004249,<br>21490853, 3012888,<br>21490851         | 38341003, 56921000,<br>8480-6, 76215-3, 8462-4,<br>76213-8         | Hypertensive disorder, Essential<br>hypertension, Systolic blood pressure,<br>Invasive systolic blood pressure, Diastolic<br>blood pressure, Invasive diastolic blood<br>pressure                                                                                                                                            |
|                       | Dyslipidemia      | 432867, 4159131, 3027114,<br>3022192, 3007070, 3028437,<br>3028288 | 55822004, 370992007,<br>2093-3, 2571-8, 2085-9,<br>2089-1, 13457-7 | Hyperlipidemia, Dyslipidemia, Cholesterol<br>[Mass/volume] in Serum of Plasma,<br>Triglyceride [Mass/volume] in Serum or<br>Plasma, Cholesterol in HDL [Mass/volume] in<br>Serum or Plasma, Cholesterol in LDL<br>[Mass/volume] in Serum or Plasma,<br>Cholesterol in LDL [Mass/volume] in Serum<br>or Plasma by calculation |
|                       | Obesity           | 3038553                                                            | 39156-5                                                            | Body mass index (BMI) [Ratio]                                                                                                                                                                                                                                                                                                |
| Comorbidities         |                   | 319835, 315286, 313217,<br>321318, 312327, 319844,                 | 42343007, 413838009,<br>49436004, 194828000,                       | Congestive heart failure, chronic ischemic<br>heart disease, atrial fibrillation, angina                                                                                                                                                                                                                                     |

|                                         |                                            |                                                           |                                                                                                                                                                     |
|-----------------------------------------|--------------------------------------------|-----------------------------------------------------------|---------------------------------------------------------------------------------------------------------------------------------------------------------------------|
|                                         | 255573, 443454, 46271022                   | 57054005, 413439005,<br>13645005, 432504007,<br>709044004 | pectoris, acute myocardial infarction, acute<br>ischemic heart disease, chronic obstructive<br>lung disease, ischemic stroke, chronic kidney<br>disease             |
| <b>Hepatic outcomes</b>                 | 4064161, 194643, 4001171                   | 19943007, 420054005,<br>109841003                         | Cirrhosis of liver, Alcoholic cirrhosis,<br>hepatocellular carcinoma                                                                                                |
| <b>Cardiac outcomes</b> (heart disease) | 319835, 315286, 313217,<br>321318, 312327, | 42343007, 413838009,<br>49436004, 194828000,<br>57054005, | Congestive heart failure, chronic ischemic<br>heart disease, atrial fibrillation, angina<br>pectoris, acute myocardial infarction, acute<br>ischemic heart disease, |
| <b>Death</b> (all-cause mortality)      | 4249566, 4052310, 4306655                  | 409651001, 16100001,<br>419620001                         | Mortality rate, Death diagnosis, Death                                                                                                                              |

**Table S2.** Amounts and patterns of alcohol consumption in patients with AFLD and NAFLD from the EMR of KHUG

|                                                                                              | <b>Alcoholic fatty liver disease</b>                                           | <b>Non-alcoholic fatty liver disease</b>                                                               |
|----------------------------------------------------------------------------------------------|--------------------------------------------------------------------------------|--------------------------------------------------------------------------------------------------------|
| Number of patients*                                                                          | N=439                                                                          | N=2,814                                                                                                |
| Male, number                                                                                 | 407 (92.7%)                                                                    | 1,760 (62.5%)                                                                                          |
| Age, mean (SD)                                                                               | 49.59 (10.78)                                                                  | 45.38 (12.90)                                                                                          |
| <b>Alcohol consumption</b>                                                                   |                                                                                |                                                                                                        |
| Non-drinker                                                                                  | 0 (0%)                                                                         | 2,344 (83.3%)                                                                                          |
| Current drinker †                                                                            | 439 (100%)                                                                     | 470 (16.7%)                                                                                            |
| Light drinker<br>(< 3 unit/day)                                                              | 2 (<0.1%)                                                                      | 292 (10.4%)                                                                                            |
| Moderate drinker<br>(3–6 unit/day)                                                           | 7 (1.6%)                                                                       | 145 (5.2%)                                                                                             |
| Heavy drinker<br>(7–9 unit/day)                                                              | 94 (21.4%)                                                                     | 18 (<0.1%)                                                                                             |
| Very heavy drinker<br>(> 9 unit/day)                                                         | 191 (43.5%)                                                                    | 15 (<0.1%)                                                                                             |
| Recorded on EMR as “heavy drinker” or<br>“binge drinker” in the electronic medical<br>record | 145 (33.0%)                                                                    | -                                                                                                      |
| Agreement between clinical diagnostic code<br>and CDM concept code                           | Any drinker: 439/439 (100%)<br>Heavy or very heavy drinker: 430/439<br>(97.9%) | Any non-drinker: 2,344/2,814 (83.3%)<br>Equal to or less than moderate drinker:<br>2,781/2,814 (98.8%) |
| Proportion of “Gray zone” ‡                                                                  | 9 (2.1%)                                                                       | 437 (15.5%)                                                                                            |

| Pattern of drinking                      |                 |                                                              |
|------------------------------------------|-----------------|--------------------------------------------------------------|
| No change during follow-up period        | 420/439 (95.7%) | Non-drinker: 2,200/2,814 (78.2%)<br>Drinker: 454/470 (96.6%) |
| No follow-up data of alcohol consumption | 6/439 (1.4%)    |                                                              |
| Stopped drinking during follow-up period | 13/439 (3.0%)   | 16/470 (3.4%)                                                |
| Started drinking during follow-up period | -               | 144/2,344 (6.1%)                                             |

AFLD, alcoholic fatty liver disease; NAFLD, non-alcoholic fatty liver disease; KHUG, Kyung Hee University Hospital at Gangdong; SD, standard deviation; CDM, common data model; EMR, electronic medical record

\* Data from KHUG, extracted by same inclusion criteria as CDM: total of 3,253/3,869 patients (84.1%) data could be accessible for manual chart review

† One unit= 10 g of alcohol

‡ Patients with light to moderate amount of alcohol consumption

**Table S3.** Study population data from each hospital

| <b>Hospital</b>                                       | <b>KHUG</b>      |                  | <b>KDH</b>       |                  | <b>KWMC</b>      |                  | <b>DCMC</b>      |                  | <b>PNUH</b>      |                  | <b>WKUH</b>      |                  | <b>AJMC</b>      |                  |
|-------------------------------------------------------|------------------|------------------|------------------|------------------|------------------|------------------|------------------|------------------|------------------|------------------|------------------|------------------|------------------|------------------|
| <b>Group</b>                                          | <b>AFLD</b>      | <b>NAFLD</b>     |
| <b>Patients with or without metabolic risk factor</b> |                  |                  |                  |                  |                  |                  |                  |                  |                  |                  |                  |                  |                  |                  |
| Patient number                                        | 618              | 3,251            | 320              | 1,342            | 238              | 1,103            | 729              | 3,417            | 160              | 1,977            | 398              | 2,011            | 606              | 3,966            |
| Male, number                                          | 569              | 2,043            | 288              | 818              | 225              | 667              | 661              | 1,999            | 147              | 1,276            | 356              | 1,197            | 552              | 2,782            |
| Age, mean (SD)                                        | 49.38<br>(10.66) | 45.64<br>(13.02) | 49.37<br>(11.53) | 45.34<br>(13.77) | 49.51<br>(10.94) | 47.33<br>(13.99) | 49.65<br>(10.97) | 48.85<br>(13.67) | 52.63<br>(10.41) | 50.06<br>(12.50) | 49.13<br>(10.46) | 49.12<br>(13.51) | 47.42<br>(10.29) | 45.40<br>(11.53) |
| Age group (years)                                     |                  |                  |                  |                  |                  |                  |                  |                  |                  |                  |                  |                  |                  |                  |
| 20–24                                                 | 2                | 164              | 7                | 82               | 4                | 69               | 4                | 147              | 1                | 51               | 1                | 89               | 9                | 132              |
| 25–29                                                 | 18               | 238              | 9                | 119              | 3                | 92               | 19               | 189              | 1                | 58               | 8                | 92               | 12               | 182              |
| 30–34                                                 | 38               | 353              | 24               | 160              | 16               | 88               | 41               | 263              | 8                | 132              | 20               | 150              | 46               | 389              |
| 35–39                                                 | 59               | 374              | 30               | 158              | 22               | 83               | 69               | 315              | 8                | 196              | 44               | 160              | 58               | 555              |
| 40–44                                                 | 87               | 380              | 32               | 127              | 29               | 99               | 103              | 310              | 18               | 207              | 63               | 227              | 121              | 626              |
| 45–49                                                 | 97               | 384              | 47               | 122              | 45               | 116              | 134              | 426              | 18               | 239              | 84               | 253              | 108              | 677              |
| 50–54                                                 | 113              | 462              | 61               | 192              | 45               | 186              | 126              | 566              | 34               | 317              | 64               | 295              | 107              | 588              |
| 55–59                                                 | 104              | 412              | 52               | 150              | 36               | 157              | 97               | 421              | 27               | 311              | 51               | 273              | 74               | 379              |
| 60–64                                                 | 54               | 258              | 25               | 120              | 16               | 94               | 60               | 337              | 32               | 224              | 26               | 212              | 38               | 191              |
| 65–69                                                 | 29               | 127              | 20               | 63               | 12               | 63               | 41               | 212              | 6                | 136              | 23               | 128              | 21               | 139              |
| <b>Patients with metabolic risk factor</b>            |                  |                  |                  |                  |                  |                  |                  |                  |                  |                  |                  |                  |                  |                  |
| <b>Diabetes mellitus</b>                              |                  |                  |                  |                  |                  |                  |                  |                  |                  |                  |                  |                  |                  |                  |
| Patient number                                        | 78               | 407              | 94               | 389              | 30               | 111              | 103              | 497              | 49               | 420              | 101              | 535              | 100              | 638              |
| Male, number                                          | 74               | 236              | 83               | 226              | 30               | 59               | 96               | 281              | 43               | 259              | 90               | 290              | 92               | 440              |
| Age, mean (SD)                                        | 52.1<br>(10.5)   | 52.6<br>(11.6)   | 50.2<br>(11.0)   | 49.7<br>(12.4)   | 53.7<br>(10.8)   | 55.2<br>(11.7)   | 53.4<br>(9.9)    | 52.6<br>(13.3)   | 53.3<br>(7.5)    | 53.5<br>(12.6)   | 52.8<br>(10.0)   | 54.2<br>(12.1)   | 50.8<br>(8.7)    | 48.6<br>(11.5)   |

| Hypertension                            |                  |                  |                  |                  |                  |                  |                  |                  |                  |                  |                  |                  |                  |                  |
|-----------------------------------------|------------------|------------------|------------------|------------------|------------------|------------------|------------------|------------------|------------------|------------------|------------------|------------------|------------------|------------------|
| Patient number                          | 205              | 904              | 78               | 324              | 37               | 123              | 133              | 775              | 25               | 406              | 101              | 604              | 199              | 1,126            |
| Male, number                            | 190              | 591              | 73               | 184              | 37               | 75               | 120              | 430              | 24               | 249              | 92               | 332              | 180              | 797              |
| Age, mean (SD)                          | 51.0<br>(10.0)   | 48.6<br>(13.5)   | 49.0<br>(10.9)   | 49.1<br>(13.9)   | 55.6<br>(9.9)    | 55.4<br>(11.1)   | 51.7<br>(10.8)   | 52.6<br>(14.5)   | 54.4<br>(8.0)    | 55.4<br>(11.3)   | 53.1<br>(10.1)   | 53.8<br>(13.3)   | 49.2<br>(9.8)    | 49.4<br>(11.8)   |
| Dyslipidemia                            |                  |                  |                  |                  |                  |                  |                  |                  |                  |                  |                  |                  |                  |                  |
| Patient number                          | 282              | 1,702            | 169              | 803              | 169              | 781              | 552              | 2,584            | 103              | 1,576            | 236              | 1,329            | 421              | 2,388            |
| Male, number                            | 261              | 1,045            | 151              | 485              | 161              | 486              | 505              | 1,543            | 95               | 1,042            | 216              | 784              | 391              | 1,727            |
| Age, mean (SD)                          | 49.7<br>(10.5)   | 47.3<br>(12.0)   | 50.1<br>(10.2)   | 46.6<br>(13.1)   | 49.6<br>(10.8)   | 49.1<br>(13.0)   | 49.0<br>(10.4)   | 49.2<br>(13.2)   | 51.2<br>(10.2)   | 49.8<br>(12.0)   | 48.7<br>(9.9)    | 49.5<br>(13.1)   | 47.4<br>(9.5)    | 46.1<br>(11.5)   |
| Obesity                                 |                  |                  |                  |                  |                  |                  |                  |                  |                  |                  |                  |                  |                  |                  |
| Patient number                          | 151              | 1,118            | 18               | 215              | NA               | NA               | NA               | NA               | NA               | NA               | 42               | 353              | 95               | 559              |
| Male, number                            | 141              | 744              | 16               | 125              | NA               | NA               | NA               | NA               | NA               | NA               | 33               | 206              | 94               | 418              |
| Age, mean (SD)                          | 49.6<br>(10.2)   | 45.6<br>(12.7)   | 51.3<br>(9.3)    | 45.7<br>(13.9)   | NA               | NA               | NA               | NA.              | NA               | NA               | 49.5<br>(9.8)    | 48.1<br>(14.1)   | 48.7<br>(9.2)    | 46.4<br>(10.1)   |
| Patients without metabolic risk factor  |                  |                  |                  |                  |                  |                  |                  |                  |                  |                  |                  |                  |                  |                  |
| Patient number, (% of the total number) | 204<br>(33.0%)   | 952<br>(29.3%)   | 96<br>(30.0%)    | 369<br>(27.5%)   | 58<br>(24.4%)    | 301<br>(27.3%)   | 138<br>(18.9%)   | 606<br>(17.7%)   | 35<br>(21.9%)    | 272<br>(13.8%)   | 104<br>(26.1%)   | 439<br>(21.8%)   | 111<br>(18.3%)   | 1,007<br>(25.4%) |
| Male, number                            | 184              | 589              | 87               | 235              | 53               | 178              | 120              | 326              | 32               | 162              | 89               | 279              | 95               | 668              |
| Age, mean (SD)                          | 47.39<br>(10.95) | 42.80<br>(13.46) | 47.80<br>(13.39) | 41.80<br>(14.16) | 49.10<br>(12.12) | 42.19<br>(15.17) | 50.76<br>(12.49) | 46.81<br>(14.47) | 56.09<br>(11.53) | 47.78<br>(14.35) | 48.08<br>(11.17) | 45.74<br>(14.06) | 46.41<br>(12.62) | 41.95<br>(11.92) |

|                                                      |                  |                  |                  |                  |                  |                  |                  |                  |                 |                  |                  |                  |                 |                  |
|------------------------------------------------------|------------------|------------------|------------------|------------------|------------------|------------------|------------------|------------------|-----------------|------------------|------------------|------------------|-----------------|------------------|
| Age group (years)                                    |                  |                  |                  |                  |                  |                  |                  |                  |                 |                  |                  |                  |                 |                  |
| 20–24                                                | 1                | 74               | 6                | 33               | 2                | 44               | 2                | 36               | 0               | 18               | 1                | 26               | 5               | 68               |
| 25–29                                                | 10               | 107              | 4                | 51               | 1                | 41               | 5                | 53               | 1               | 15               | 4                | 38               | 4               | 88               |
| 30–34                                                | 17               | 121              | 9                | 54               | 4                | 29               | 7                | 59               | 1               | 22               | 6                | 43               | 12              | 124              |
| 35–39                                                | 26               | 107              | 9                | 56               | 7                | 28               | 13               | 61               | 1               | 29               | 9                | 49               | 11              | 171              |
| 40–44                                                | 34               | 87               | 8                | 30               | 5                | 25               | 18               | 51               | 3               | 27               | 21               | 61               | 19              | 154              |
| 45–49                                                | 29               | 105              | 14               | 27               | 11               | 23               | 23               | 70               | 4               | 27               | 25               | 37               | 20              | 143              |
| 50–54                                                | 38               | 115              | 13               | 36               | 7                | 43               | 19               | 81               | 6               | 34               | 11               | 57               | 11              | 112              |
| 55–59                                                | 19               | 124              | 14               | 30               | 10               | 25               | 14               | 66               | 4               | 36               | 9                | 48               | 11              | 65               |
| 60–64                                                | 11               | 33               | 9                | 25               | 5                | 16               | 16               | 61               | 9               | 29               | 5                | 36               | 7               | 34               |
| 65–69                                                | 17               | 53               | 4                | 15               | 4                | 14               | 10               | 31               | 2               | 19               | 10               | 27               | 7               | 31               |
| <b>Patients with 1 or more metabolic risk factor</b> |                  |                  |                  |                  |                  |                  |                  |                  |                 |                  |                  |                  |                 |                  |
| Patient number                                       | 415              | 2,329            | 224              | 965              | 178              | 795              | 591              | 2,808            | 125             | 1,702            | 295              | 1,572            | 495             | 2,950            |
| Male, number                                         | 385              | 1,449            | 201              | 577              | 170              | 493              | 541              | 1,670            | 115             | 1,113            | 268              | 918              | 457             | 2,109            |
| Age, mean (SD)                                       | 50.36<br>(10.38) | 46.82<br>(12.65) | 50.09<br>(10.57) | 46.73<br>(13.38) | 49.57<br>(10.60) | 49.29<br>(13.00) | 49.40<br>(10.58) | 49.30<br>(13.45) | 51.66<br>(9.91) | 50.43<br>(12.14) | 49.49<br>(10.18) | 50.06<br>(13.20) | 47.64<br>(9.69) | 46.57<br>(11.17) |
| <b>Patients with 2 or more metabolic risk factor</b> |                  |                  |                  |                  |                  |                  |                  |                  |                 |                  |                  |                  |                 |                  |
| Patient number                                       | 266              | 1,522            | 139              | 681              | 123              | 566              | 384              | 1,990            | 85              | 1,291            | 222              | 1,286            | 337             | 1,952            |
| Male, number                                         | 247              | 968              | 129              | 402              | 118              | 354              | 351              | 1,196            | 79              | 852              | 201              | 752              | 312             | 1,432            |
| Age, mean (SD)                                       | 50.01<br>(9.97)  | 47.84<br>(12.42) | 50.12<br>(10.19) | 47.95<br>(12.99) | 49.94<br>(10.75) | 50.31<br>(12.53) | 49.18<br>(10.18) | 49.53<br>(13.30) | 51.31<br>(9.08) | 50.81<br>(11.75) | 49.88<br>(10.10) | 50.48<br>(13.04) | 48.57<br>(9.13) | 47.07<br>(11.06) |

Values are presented as mean±standard deviation or number (%)

KHUG, Kyung Hee University Hospital at Gangdong; KDH, Hallym University Kangdong Sacred Heart Hospital; KWMC, Kangwon National University Hospital; DCMC, Daegu Catholic University Medical Center; PNUH, Pusan National University Hospital; WKUH, Wonkwang University Hospital; AJMC, Ajou University Hospital; AFLD, alcoholic fatty liver disease; NAFLD, nonalcoholic fatty liver disease; SD, standard deviation.



\* Obesity data from 3 centers (Kangwon National University Hospital, Daegu Catholic University Medical Center, Pusan National University Hospital) were not available.

**Table S4.** Risk of adverse cardiac and hepatic outcomes on intergroup comparisons between those with AFLD and those with NAFLD.

|                       | Outcome incidence | Outcome incidence<br>(Events /Follow-up time<br>[person-year]) | Adjusted risk<br>ratio* | 95% Confidence<br>interval | <i>P</i> value   |
|-----------------------|-------------------|----------------------------------------------------------------|-------------------------|----------------------------|------------------|
| <b>AFLD vs. NAFLD</b> |                   |                                                                |                         |                            |                  |
| Any MetR †            | Cardiac outcomes  | 66/10,851 vs. 174/34,110                                       | 1.19                    | 0.89–1.58                  | 0.24             |
|                       | Hepatic outcomes  | 101/10,842 vs. 52/34,436                                       | 5.81                    | 4.14–8.15                  | <b>&lt;0.001</b> |

AFLD, alcoholic fatty liver disease; NAFLD, non-alcoholic fatty liver disease; MetR, metabolic risk factor.

\* Model adjusted for age and sex in each hospital data included, and meta-analyses were undertaken to obtain cumulative incidence estimates (by person-year) using a random-effects model.

†Data of hazard ratios and 95% confidence intervals for the incidence (event per person-year) of outcomes by Cox proportional hazard models were used in six hospitals, except Wonkwang University Hospital.

**Table S5.** Annual incidence of study outcomes according to burden of metabolic risk factors

| Year since index date                        | 1     | 2     | 3     | 4     | 5     | 6     | 7   | 8   | 9   | 10  | 11  | 12  | 13 | 14 |
|----------------------------------------------|-------|-------|-------|-------|-------|-------|-----|-----|-----|-----|-----|-----|----|----|
| <b>Alcoholic fatty liver disease</b>         |       |       |       |       |       |       |     |     |     |     |     |     |    |    |
| Patient without metabolic risk factor        |       |       |       |       |       |       |     |     |     |     |     |     |    |    |
| Number at risk                               | 485   | 437   | 405   | 361   | 321   | 279   | 237 | 193 | 149 | 118 | 84  | 54  | 29 | 16 |
| Cirrhosis (Event per year)                   | 0     | 1     | 3     | 0     | 0     | 3     | 5   | 2   | 4   | 2   | 1   | 2   | 2  | 1  |
| Liver cancer (Event per year)                | 0     | 0     | 0     | 1     | 0     | 1     | 0   | 0   | 0   | 1   | 0   | 0   | 0  | 1  |
| Heart disease (Event per year)               | 0     | 0     | 0     | 2     | 1     | 0     | 2   | 2   | 3   | 3   | 4   | 1   | 3  | 3  |
| Overall death (Event per year)               | 1     | 3     | 1     | 2     | 1     | 2     | 0   | 1   | 1   | 1   | 1   | 0   | 0  | 0  |
| Patient with $\geq 1$ metabolic risk factor  |       |       |       |       |       |       |     |     |     |     |     |     |    |    |
| Number at risk                               | 1,751 | 1,591 | 1,435 | 1,308 | 1,190 | 1,035 | 858 | 680 | 496 | 351 | 251 | 164 | 98 | 43 |
| Cirrhosis (Event per year)                   | 0     | 2     | 7     | 2     | 9     | 11    | 5   | 11  | 13  | 9   | 6   | 5   | 7  | 5  |
| Liver cancer (Event per year)                | 0     | 0     | 0     | 1     | 0     | 0     | 3   | 1   | 1   | 0   | 0   | 0   | 1  | 1  |
| Heart disease (Event per year)               | 0     | 2     | 3     | 0     | 1     | 6     | 5   | 9   | 11  | 9   | 9   | 3   | 5  | 10 |
| Overall death (Event per year)               | 9     | 7     | 2     | 6     | 8     | 6     | 4   | 3   | 0   | 2   | 1   | 0   | 0  | 1  |
| Patient with $\geq 2$ metabolic risk factors |       |       |       |       |       |       |     |     |     |     |     |     |    |    |
| Number at risk                               | 1,214 | 1,103 | 1,004 | 920   | 831   | 722   | 587 | 458 | 341 | 232 | 161 | 104 | 60 | 26 |
| Cirrhosis (Event per year)                   | 0     | 2     | 4     | 1     | 4     | 7     | 4   | 7   | 6   | 8   | 5   | 3   | 4  | 2  |
| Liver cancer                                 | 0     | 0     | 0     | 1     | 0     | 0     | 2   | 1   | 0   | 0   | 0   | 0   | 0  | 0  |

|                                              |       |       |       |       |       |       |       |       |       |       |       |       |     |     |
|----------------------------------------------|-------|-------|-------|-------|-------|-------|-------|-------|-------|-------|-------|-------|-----|-----|
| (Event per year)                             |       |       |       |       |       |       |       |       |       |       |       |       |     |     |
| Heart disease<br>(Event per year)            | 0     | 1     | 2     | 0     | 0     | 5     | 4     | 4     | 5     | 9     | 7     | 3     | 5   | 7   |
| Overall death<br>(Event per year)            | 6     | 6     | 2     | 3     | 3     | 3     | 3     | 1     | 0     | 1     | 1     | 0     | 0   | 0   |
| <b>Non-alcoholic fatty liver disease</b>     |       |       |       |       |       |       |       |       |       |       |       |       |     |     |
| Patient without metabolic risk factor        |       |       |       |       |       |       |       |       |       |       |       |       |     |     |
| Number at risk                               | 2,546 | 2,317 | 2,114 | 1,923 | 1,721 | 1,478 | 1,260 | 1,031 | 923   | 623   | 475   | 319   | 203 | 106 |
| Cirrhosis<br>(Event per year)                | 0     | 3     | 1     | 1     | 1     | 3     | 3     | 3     | 4     | 2     | 1     | 4     | 2   | 1   |
| Liver cancer<br>(Event per year)             | 0     | 0     | 0     | 0     | 0     | 0     | 1     | 0     | 0     | 0     | 0     | 1     | 0   | 1   |
| Heart disease<br>(Event per year)            | 0     | 0     | 0     | 1     | 3     | 4     | 5     | 6     | 6     | 5     | 7     | 5     | 5   | 7   |
| Overall death<br>(Event per year)            | 6     | 4     | 3     | 1     | 2     | 1     | 6     | 0     | 1     | 2     | 3     | 3     | 1   | 0   |
| Patient with $\geq 1$ metabolic risk factor  |       |       |       |       |       |       |       |       |       |       |       |       |     |     |
| Number at risk                               | 9,930 | 9,141 | 8,406 | 7,665 | 6,789 | 5,796 | 4,642 | 3,712 | 2,823 | 2,109 | 1,510 | 1,010 | 579 | 308 |
| Cirrhosis<br>(Event per year)                | 0     | 1     | 4     | 3     | 7     | 9     | 18    | 11    | 8     | 4     | 9     | 6     | 9   | 4   |
| Liver cancer<br>(Event per year)             | 0     | 0     | 1     | 1     | 1     | 1     | 1     | 2     | 5     | 1     | 2     | 2     | 2   | 1   |
| Heart disease<br>(Event per year)            | 2     | 1     | 5     | 12    | 15    | 27    | 36    | 30    | 41    | 44    | 44    | 39    | 42  | 37  |
| Overall death<br>(Event per year)            | 19    | 12    | 11    | 12    | 18    | 10    | 15    | 10    | 8     | 7     | 7     | 4     | 3   | 0   |
| Patient with $\geq 2$ metabolic risk factors |       |       |       |       |       |       |       |       |       |       |       |       |     |     |
| Number at risk                               | 7,243 | 6,675 | 6,148 | 5,599 | 4,930 | 4,205 | 3,322 | 2,639 | 1,990 | 1,477 | 1,051 | 699   | 396 | 190 |
| Cirrhosis<br>(Event per year)                | 0     | 1     | 2     | 1     | 7     | 5     | 11    | 9     | 6     | 3     | 7     | 4     | 5   | 4   |

|                                   |    |   |   |   |    |    |    |    |    |    |    |    |    |    |
|-----------------------------------|----|---|---|---|----|----|----|----|----|----|----|----|----|----|
| Liver cancer<br>(Event per year)  | 0  | 0 | 1 | 1 | 2  | 0  | 0  | 3  | 3  | 1  | 0  | 2  | 1  | 1  |
| Heart disease<br>(Event per year) | 0  | 1 | 2 | 9 | 15 | 25 | 27 | 23 | 33 | 37 | 38 | 31 | 29 | 27 |
| Overall death<br>(Event per year) | 13 | 8 | 6 | 9 | 11 | 9  | 14 | 10 | 8  | 5  | 3  | 3  | 2  | 0  |

**Table S6.** Intergroup comparison of the risk of stroke between patients with AFLD and those with NAFLD according to MetR

| Presence of MetR      | Outcome incidence | Outcome incidence (Events /Follow-up time [person-year]) | Adjusted risk ratio* | 95% Confidence interval | <i>P</i> value |
|-----------------------|-------------------|----------------------------------------------------------|----------------------|-------------------------|----------------|
| <b>AFLD vs. NAFLD</b> |                   |                                                          |                      |                         |                |
| Without MetR †        | Stroke            | 12/2,425 vs. 15/5,989                                    | 2.23                 | 1.03-4.82               | <b>0.04</b>    |
| MetR ≥ 1 †            |                   | 43/7,580 vs. 82/23,276                                   | 1.68                 | 1.10-2.55               | <b>0.02</b>    |
| MetR ≥ 2              |                   | 33/5,015 vs. 56/16,631                                   | 1.96                 | 1.27-3.02               | <b>0.002</b>   |

AFLD, alcoholic fatty liver disease; NAFLD, non-alcoholic fatty liver disease; MetR, metabolic risk factor.

\* Model adjusted for age and sex in each hospital data included, and meta-analyses were performed to obtain cumulative incidence estimates (by person-year) using a random-effects model.

†Data of hazard ratios and 95% confidence intervals for the incidence (event per person-year) of outcomes by Cox proportional hazard models were used in six hospitals, except in Ajou University Hospital.

**Table S7.** Intragroup comparison of the risk of stroke between patients with AFLD and those with NAFLD according to MetR

|                        | Outcome incidence | Outcome incidence (Events /Follow-up time [person-year]) | Adjusted risk ratio* | 95% Confidence interval | P value      |
|------------------------|-------------------|----------------------------------------------------------|----------------------|-------------------------|--------------|
| <b>AFLD</b>            |                   |                                                          |                      |                         |              |
| No MetR vs. MetR ≥ 1 † | Stroke            | 12/2,616 vs. 27/5,732                                    | 1.10                 | 0.56-2.17               | 0.78         |
| No MetR vs. MetR ≥ 2 † |                   | 12/2,616 vs. 30/5,050                                    | 0.90                 | 0.46-1.76               | 0.77         |
| <b>NAFLD</b>           |                   |                                                          |                      |                         |              |
| No MetR vs. MetR ≥ 1 † | Stroke            | 17/11,912 vs. 79/24,087                                  | 0.48                 | 0.29-0.80               | <b>0.005</b> |
| No MetR vs. MetR ≥ 2 † |                   | 17/11,494 vs. 82/22,220                                  | 0.46                 | 0.27-0.77               | <b>0.003</b> |

AFLD, alcoholic fatty liver disease; NAFLD, non-alcoholic fatty liver disease; MetR, metabolic risk factor.

\* Model adjusted for age and sex in each hospital data included, and meta-analyses were performed to obtain cumulative incidence estimates (by person-year) using a random-effects model.

†Data of hazard ratios and 95% confidence intervals for the incidence (event per person-year) of outcomes by Cox proportional hazard models were used in six hospitals, except in Ajou University Hospital.
